# Supplementary material for: p53 immunohistochemistry in endometrial cancer: clinical and molecular correlates in the PORTEC-3 trial
Source: PubMed Central journal article supplement (PMC7613653; doi:10.1038/s41379-022-01102-x), 2022-06-25
Supplement: EMS144857-supplement-Supplementary_Material.pdf [file EMS144857-supplement-Supplementary_Material.pdf]

**Figure S1.** Representative example of an endometrial cancer, classified as 'no specific molecular profile', showing multifocal subclonal abnormal p53 expression in small foci, comprising less than 10% of the tumoral volume. A missense *TP53* mutation was found with next generation sequencing using DNA obtained from randomly taken tumor cores.

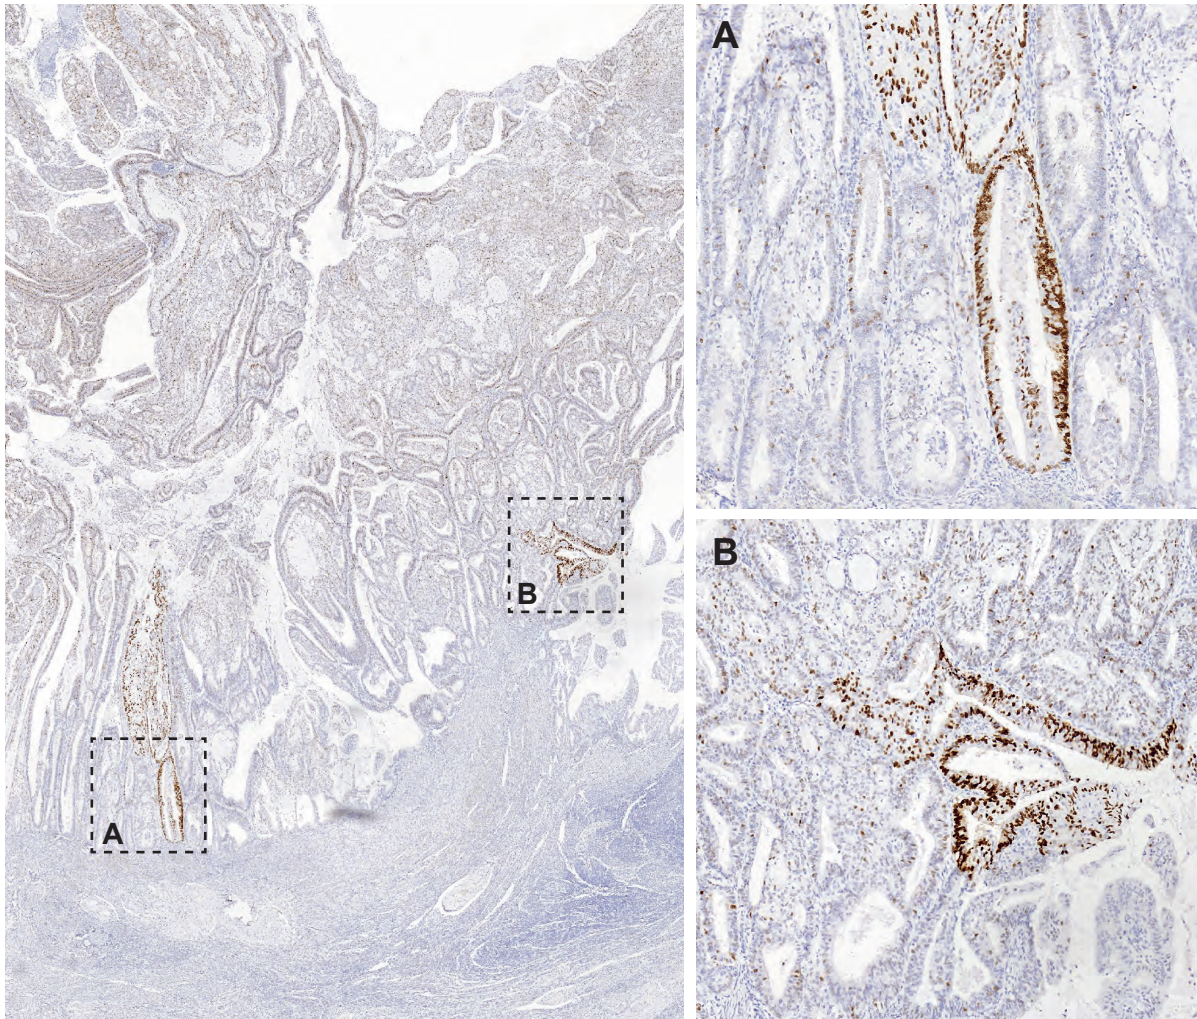

**Figure S2.** Cases with unequivocal mutant overexpression of p53 by immunohistochemistry (IHC) without evidence of a *TP53* mutation by next generation sequencing. For these cases, the assigned p53 status was not adjusted, given the very convincing IHC result.

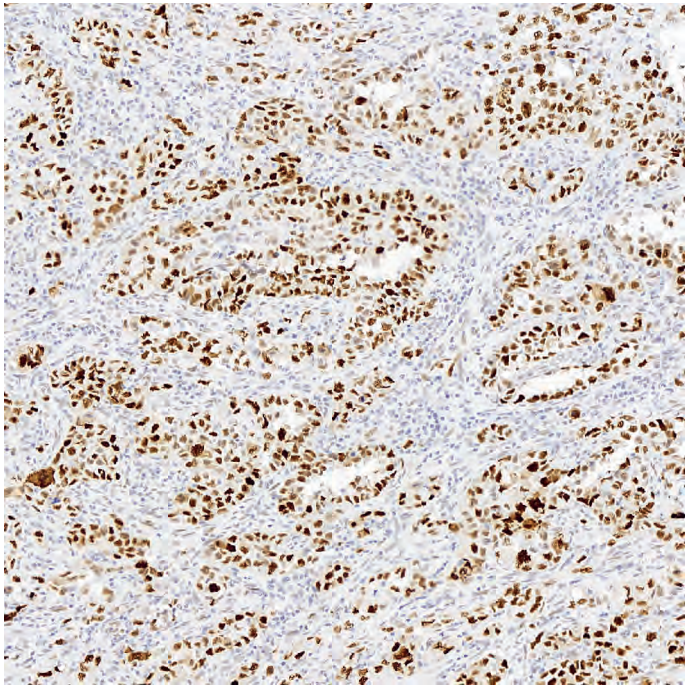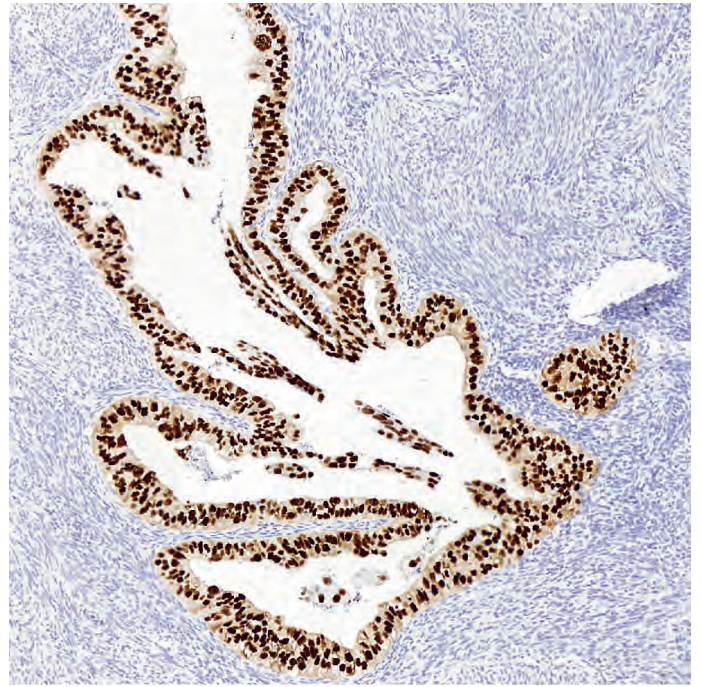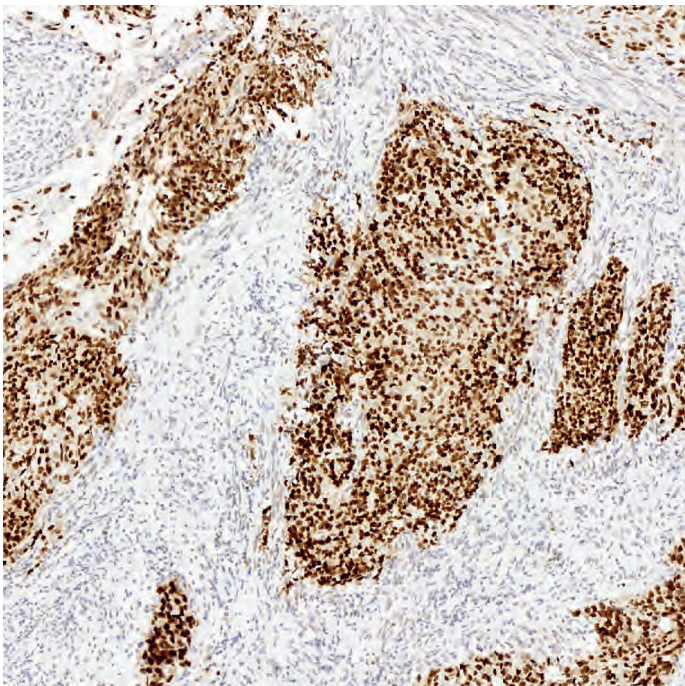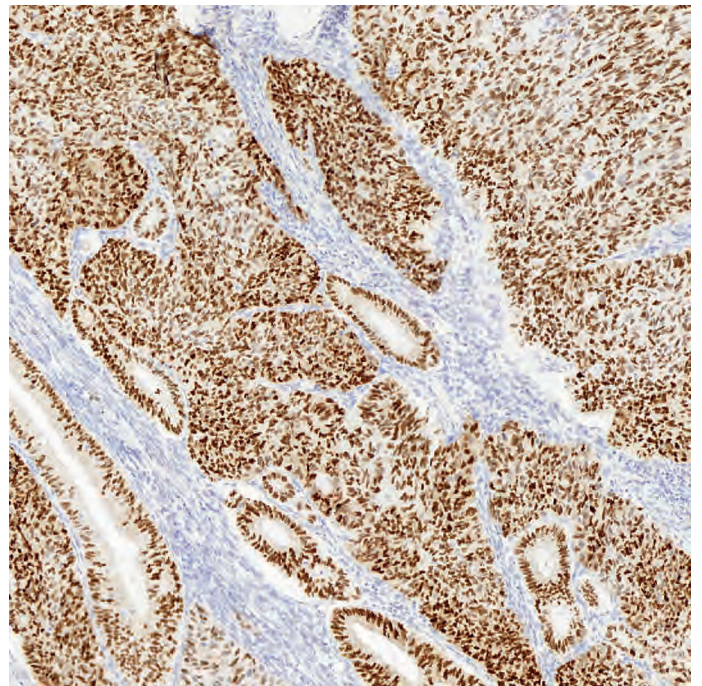

**Figure S3.** Time-to-recurrence for p53-abnormal high-risk endometrial cancers (n=98), stratified by p53 immunohistochemical staining pattern (A) and type of *TP53* mutation\* (B).

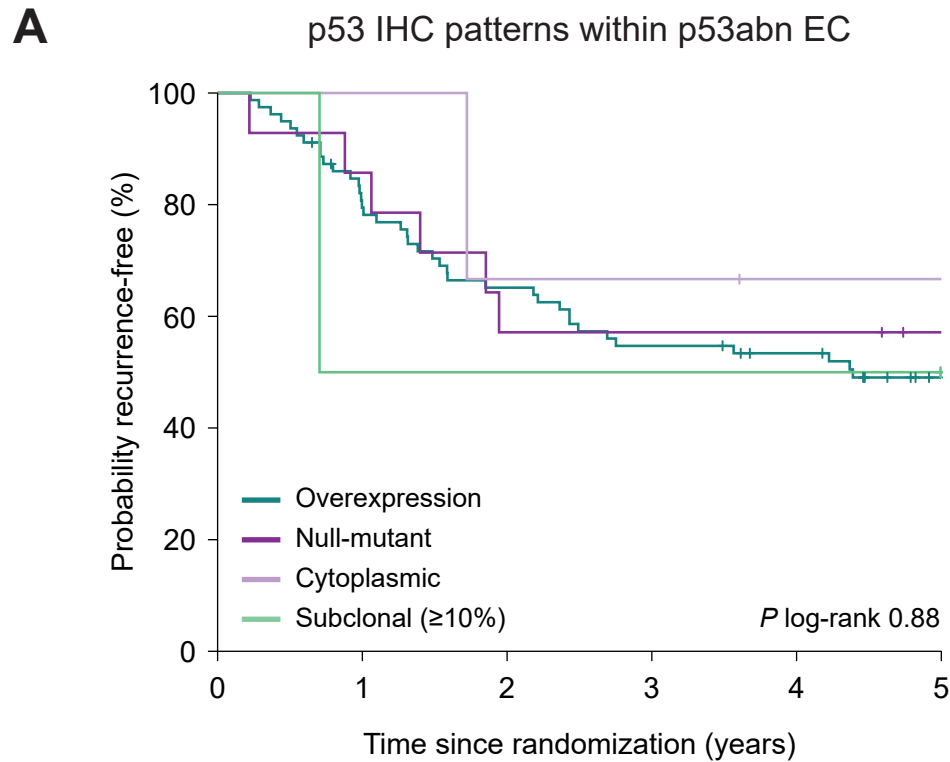

| No. at risk      | 0  | 1  | 2  | 3  | 4  | 5  |
|------------------|----|----|----|----|----|----|
| Overexpression   | 79 | 61 | 50 | 42 | 38 | 28 |
| Null-mutant      | 14 | 12 | 8  | 8  | 8  | 6  |
| Cytoplasmic      | 3  | 3  | 2  | 2  | 1  | 1  |
| Subclonal (≥10%) | 2  | 1  | 1  | 1  | 1  | 0  |

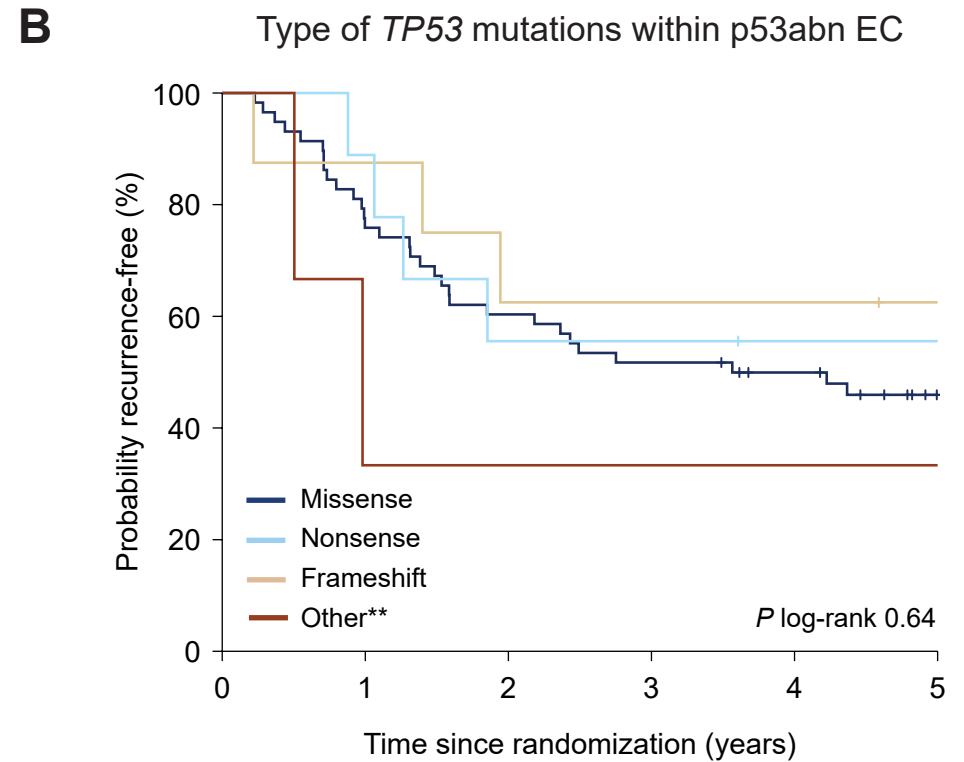

| No. at risk | 0  | 1  | 2  | 3  | 4  | 5  |
|-------------|----|----|----|----|----|----|
| Missense    | 58 | 44 | 35 | 30 | 26 | 17 |
| Nonsense    | 9  | 8  | 5  | 5  | 4  | 4  |
| Frameshift  | 8  | 7  | 5  | 5  | 5  | 4  |
| Other**     | 3  | 1  | 1  | 1  | 1  | 1  |

\*p53-abnormal endometrial cancers without a *TP53* mutation ( $n = 4$ ) or with failed *TP53* mutation analysis ( $n = 16$ ) were excluded from the analysis

\*\* Other mutations include two in-frame deletions and one splice-site *TP53* mutation

**Table S1.** Description of endometrial cancers with discordant results between p53 immunohistochemistry and TP53 NGS analysis.

| Case number | Molecular subgroup* | Histotype and grade | p53 IHC pattern                 | TP53 mutation detected | Type of mutation        | VAF          |
|-------------|---------------------|---------------------|---------------------------------|------------------------|-------------------------|--------------|
| 1           | POLE                | GR3 EEC             | Wildtype                        | Yes                    | Nonsense                | 0.47         |
| 2           | POLE                | GR3 EEC             | Wildtype                        | Yes                    | Missense<br>Splice-site | 0.28<br>0.27 |
| 3           | POLE                | GR3 EEC             | Wildtype                        | Yes                    | Missense                | 0.24         |
| 4           | POLE                | Other               | Wildtype                        | Yes                    | Missense                | 0.20         |
| 5           | POLE                | SEC                 | Wildtype                        | Yes                    | Nonsense                | 0.15         |
| 6           | MMRd                | GR1-2 EEC           | Wildtype                        | Yes                    | Missense                | 0.30         |
| 7           | MMRd                | GR1-2 EEC           | Wildtype                        | Yes                    | Missense                | 0.16         |
| 8           | MMRd                | GR1-2 EEC           | Wildtype                        | Yes                    | Missense                | 0.25         |
| 9           | MMRd                | GR1-2 EEC           | Wildtype                        | Yes                    | Nonsense                | 0.64         |
| 10          | MMRd                | GR3 EEC             | Wildtype                        | Yes                    | Missense                | 0.21         |
| 11          | MMRd                | GR3 EEC             | Wildtype                        | Yes                    | Missense                | 0.34         |
| 12          | MMRd                | GR3 EEC             | Wildtype                        | Yes                    | Missense                | 0.26         |
| 13          | MMRd                | GR3 EEC             | Wildtype                        | Yes                    | Missense<br>Nonsense    | 0.41<br>0.36 |
| 14          | MMRd                | CCC                 | Wildtype                        | Yes                    | Missense                | 0.20         |
| 15          | MMRd                | CCC                 | Wildtype                        | Yes                    | Frame-shift             | 0.73         |
| 16          | POLE                | GR3 EEC             | Subclonal p53 expression (<10%) | No                     | -                       |              |
| 17          | POLE                | EEC-CCC             | Subclonal p53 expression (<10%) | No                     | -                       |              |
| 18          | POLE                | Other               | Subclonal p53 expression (<10%) | No                     | -                       |              |
| 19          | MMRd                | GR1-2 EEC           | Subclonal p53 expression (<10%) | No                     | -                       |              |
| 20          | NSMP                | GR1-2 EEC           | Subclonal p53 expression (<10%) | No                     | -                       |              |
| 21          | MMRd                | GR3 EEC             | Subclonal p53 expression (<10%) | No                     | -                       |              |
| 22          | MMRd                | GR3 EEC             | Subclonal p53 expression (≥10%) | No                     | -                       |              |
| 23          | MMRd                | GR3 EEC             | Subclonal p53 expression (≥10%) | No                     | -                       |              |
| 24          | NSMP                | SEC                 | Wildtype                        | Yes                    | Frame-shift             | 0.63         |
| 25          | NSMP                | EEC-SEC             | Wildtype                        | Yes                    | Frame-shift             | 0.88         |
| 26          | NSMP                | SEC                 | Wildtype                        | Yes                    | Nonsense                | 0.38         |
| 27          | NSMP                | GR1-2 EEC           | Mutant overexpression           | No                     | -                       |              |
| 28          | NSMP                | SEC                 | Wildtype                        | Yes                    | Missense                | 0.83         |
| 29          | p53                 | CCC                 | Mutant overexpression           | No                     | -                       |              |
| 30          | p53                 | SEC                 | Mutant overexpression           | No                     | -                       |              |
| 31          | p53                 | GR3 EEC             | Mutant overexpression           | No                     | -                       |              |
| 32          | p53                 | GR3 EEC             | Mutant overexpression           | No                     | -                       |              |

\* Classified as per Leon-Castillo et al., JCO 2020, considering a 10% threshold to assign a tumor as p53abn EC.

Abbreviations: POLEmut, POLE mutant; MMRd, mismatch repair deficient; NSMP, no specific molecular profile; p53abn, p53-abnormal; EEC, endometrioid endometrial cancer; CCC, clear cell carcinoma; SEC, serous endometrial cancer; VAF, variant allele frequency
